# Supplementary material for: Protective neutralizing epitopes in SARS‐CoV‐2
Source: PubMed Central journal article supplement (PMC9348472; doi:10.1111/imr.13084), 2022-05-22

RBS-A

RBS-B

RBS-C

RBS-D

Lateral

N343

CR3022 cryptic

- SARS-CoV-2
- CC12\_1
- CC12\_2
- COVAD2-04
- B38
- C6
- CV30
- C105
- BD-236
- BD-604
- BD-629
- STE90-C11
- BRI1-196
- F4A1
- S2H14
- LY-Cov4481
- 910-30
- COVAX-222
- COVAX-150
- COVAX-158
- COVAX-269
- COVAX-140
- P2B-1A1
- P2B-1A10
- P5A-3A1
- P5A-1B8
- P5A-2G9
- P5A-1B2
- WT-193
- ION-360
- S2K146
- FI-3A
- Beta-29
- Beta-27
- Beta-22
- MW07
- PDI\_37
- PDI\_42
- PDI\_210
- PDI\_231
- PDI\_231
- P22A-1D1
- P5A-102
- P5A-3C8
- BD-515
- BD-508
- abl1
- CS23
- CS23
- R40-168
- COVAD2-39
- BD23
- Z-4
- REGN-250
- REGN10933
- BRI1-198
- CT-P59
- S2H13
- S2M11
- C002
- C002
- C144
- LY-Cov555
- 2-15
- CV05-163
- S-B8
- S-B9
- COVAX-88
- COVAX-253H55L
- COVAX-384
- COVAX-316
- COVAX-253
- COVAX-253H165L
- DH103
- DH104
- P5A-2G7
- P5A-1B9
- P5A-2F11
- P5A-3C12
- H3
- H4
- S2E12
- Beta-26
- Beta-44
- Beta-47
- ASSTnow\_5A6
- PDI\_222
- P5C3
- AZD8895
- ab4
- S2M11
- B1-242\_1
- 8G6
- A23-58\_1
- S2E12
- HbnC3t1p1\_C6
- BD-623
- Zhou\_47D1
- ASSTnow\_5A6
- BG1-22
- BG4-25
- REGN10989
- CV503
- BD-771
- BD-366
- 3G9
- J08
- CS44
- CV07-287
- CV07-209
- EG-369-2
- 2E2F
- CV07-270
- P17
- 52
- 1-57
- COVAX-58
- S-B3
- Beta-38
- WRAIR-2173
- PDI\_93
- PDI\_215
- N-612-017
- AB1061
- ab5
- S2D106
- BG1-24
- CA521
- BG7-20
- BG7-24
- REGN10987
- C110
- C119
- COVAX-75
- 2-7
- Beta-55
- Beta-54
- Beta-32
- Beta-24
- PDI\_96
- XG005
- COVAX-278
- LY-COV1404
- BG7-15
- BD-812
- BD-821
- ADG20
- COVAX-5688
- COVAX-45
- S2H97
- ION-300
- WRAIR-2057
- N-612-056
- S309
- REGN10987
- CV38-142
- C548
- Beta-50
- Beta-49
- Beta-53
- Beta-6
- BG10-19
- EY6A
- S244
- S304
- COVAX-116
- COVAX-2022-86
- DH1047
- CR3022
- C022
- S2K259
- MW06
- WT-2467
- CR3022
- GH-12
- S2K35
- CV2-75
- ASSTnow\_3D11
- REGN10985
- AD1-62113

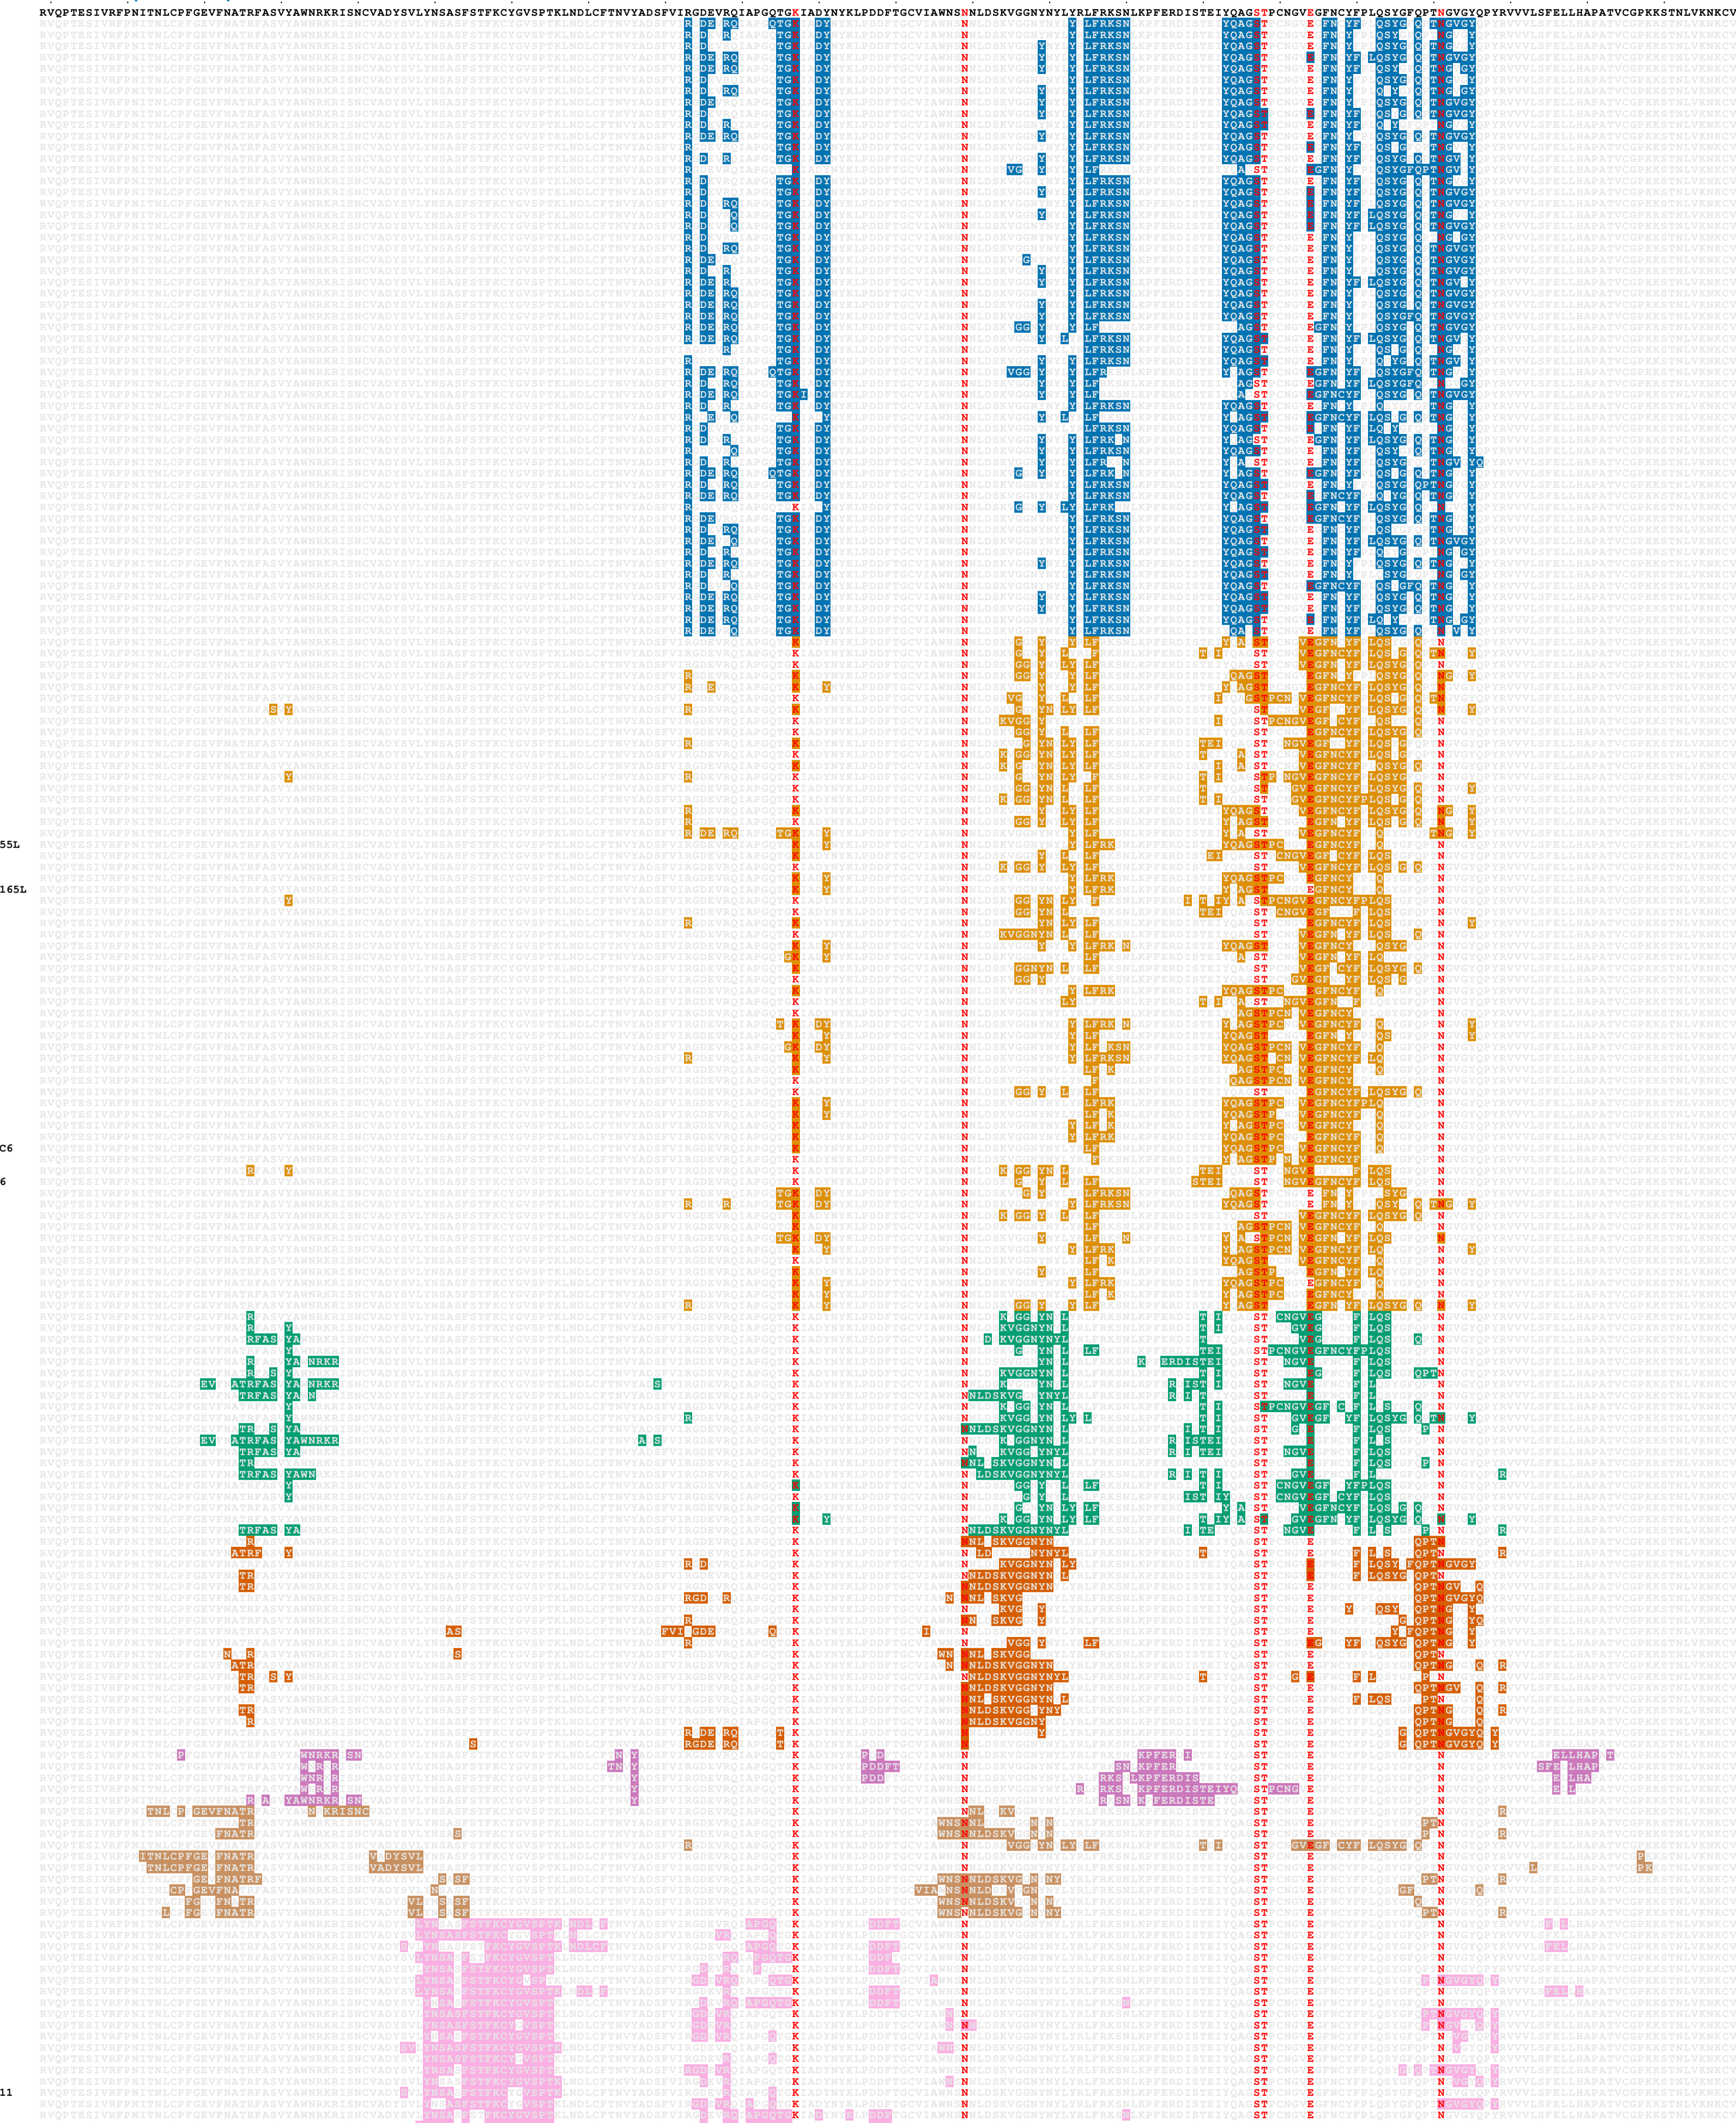

Supplement: IMR-9999-0-s001.pdf [file IMR-9999-0-s001.pdf]
